# Supplementary material for: Graphene-wrapped mesoporous MnCO3 single crystals synthesized by a dynamic floating electrodeposition method for high performance lithium-ion storage
Source: Royal Society of Chemistry journal article supplement (doi:10.1039/c5ta02713f), 2015-01-01
Supplement: c5ta02713f1.pdf [file c5ta02713f1.pdf]

Supporting Information for  
**Graphene-Wrapped Mesoporous MnCO<sub>3</sub> Single Crystals Synthesized from  
Dynamic Floating Electrodeposition Method for High Performance Lithium-  
ion Storage**

Mingwen Gao<sup>§,†</sup>, Xinwei Cui<sup>§,‡,\*</sup>, Renfei Wang<sup>‡</sup>, Tianfei Wang<sup>‡</sup>, and Weixing Chen<sup>†,\*</sup>

<sup>†</sup> Department of Chemical and Materials Engineering, University of Alberta, Edmonton, Alberta, Canada, T6G 2G6

<sup>‡</sup> AdvEN Solutions Inc., 3231 Tredger Close, Edmonton, Alberta, Canada, T6R 3T6

<sup>§</sup>M. Gao and X. Cui contribute equally to this work.

\*Address Correspondence [weixing.chen@ualberta.ca](mailto:weixing.chen@ualberta.ca) or [xinwei.cui@adven-solutions.com](mailto:xinwei.cui@adven-solutions.com).

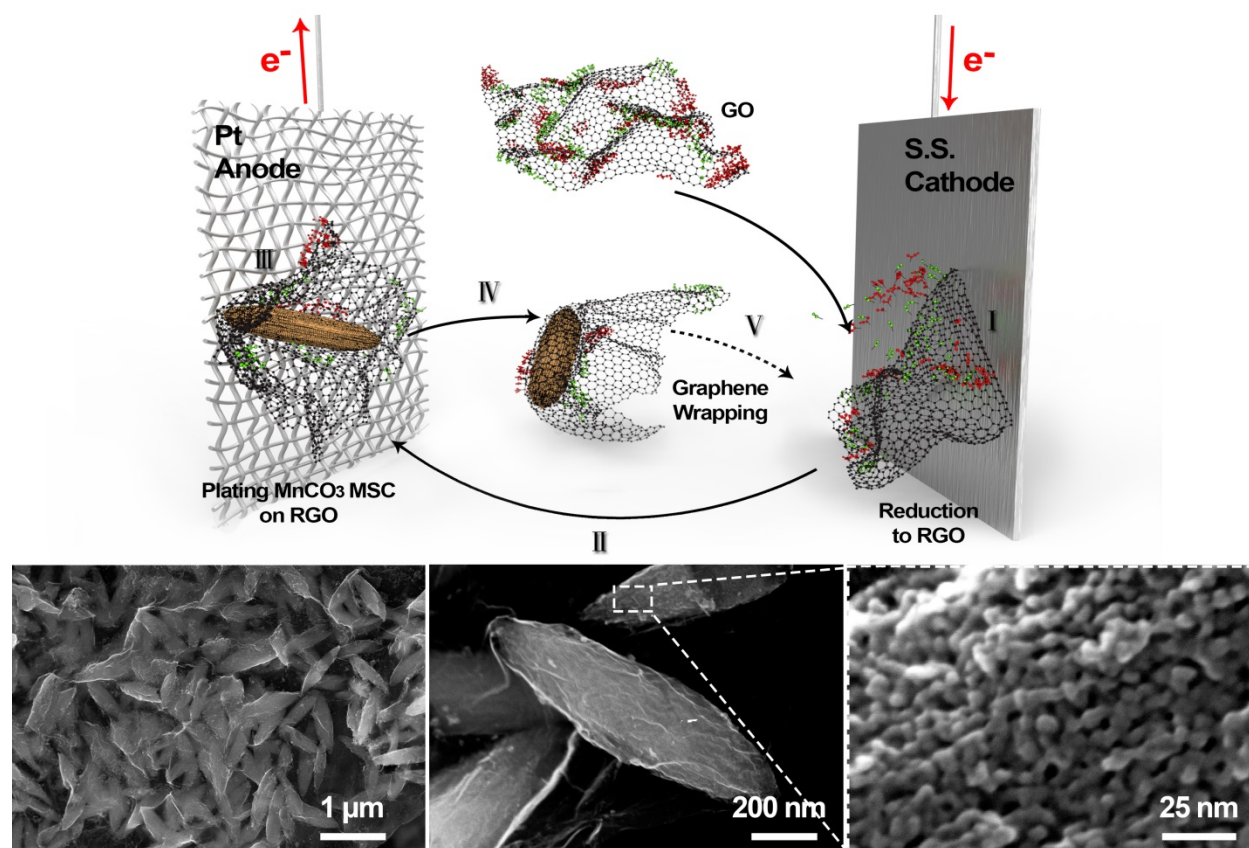

## **Table of Contents**

- 1. Control experiment I (Figure S1)**
- 2. Control experiment II (Figure S2)**
- 3. More SEM and EDX results of graphene-wrapped  $\text{MnCO}_3$  MSCs (Figures S3 and S4)**
- 4. More XPS data (Figure S5)**
- 5. Nanocrystalline  $\text{MnCO}_3$  with RGO (nc- $\text{MnCO}_3$ -RGO) (Figure S6)**
- 6. Nanoflake  $\text{MnO}_2$  with RGO (nano- $\text{MnO}_2$ -RGO) (Figure S7)**
- 7. More electrochemical data (Figure S8)**
- 8. Characterization of graphene-wrapped  $\text{MnCO}_3$  MSCs and nc- $\text{MnCO}_3$ -RGO after hundreds of cycles. (Figure S9)**

## 1. Control experiment I

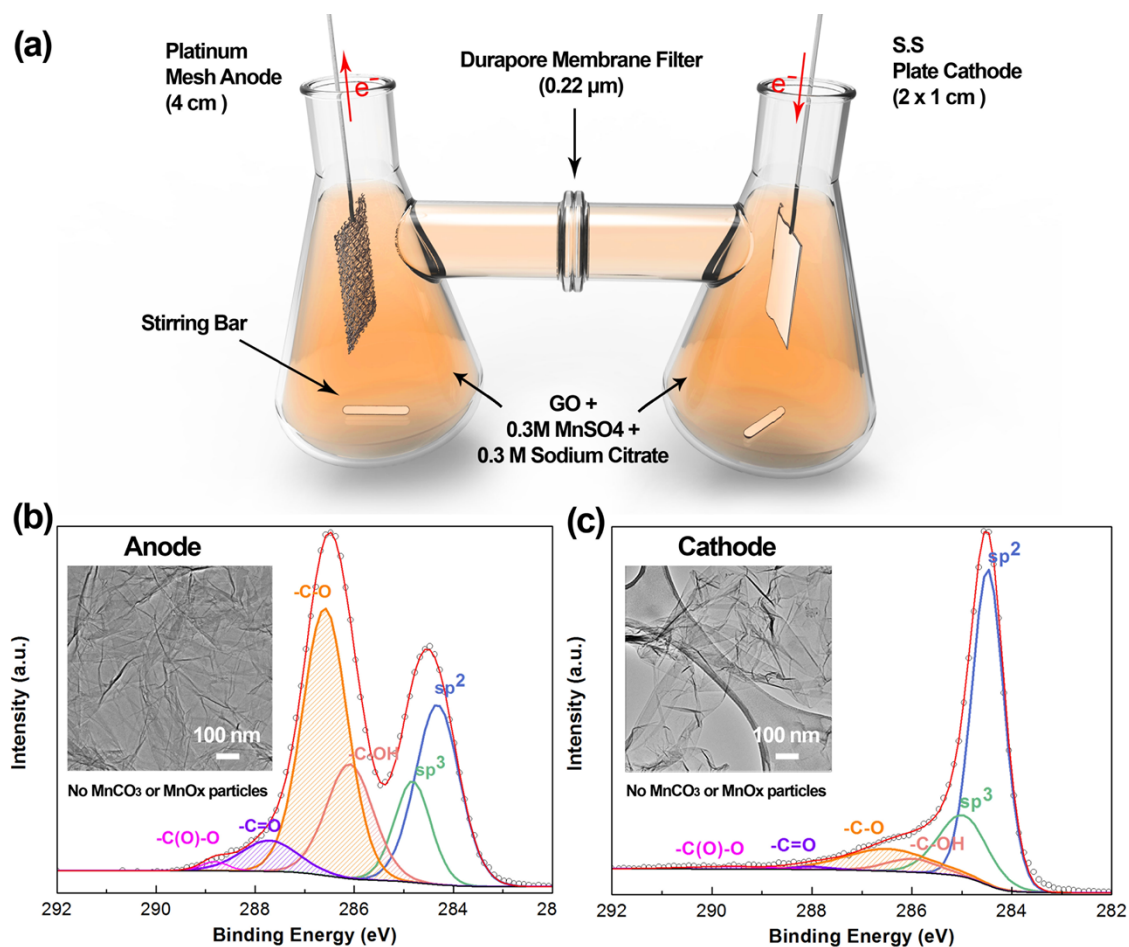

**Figure S1.** (a) The setup of the comparative experiment, in which the electrolyte was separated by a membrane at the center. All other parameters were controlled exactly the same as those in DFE method in Figure 1a. (b) XPS and (c) TEM analyses of the products collected from anode and cathode.

## 2. Control experiment II

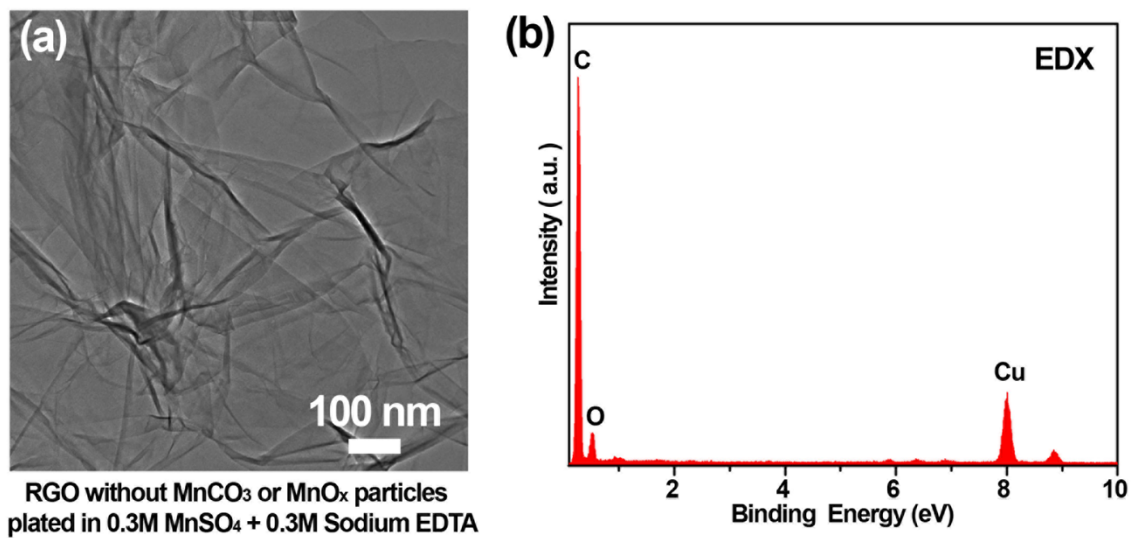

**Figure S2.** TEM and EDX analyses of the products collected from the plating solution of 0.3 M MnSO<sub>4</sub> and 0.3 M sodium EDTA. All other parameters were controlled exactly the same as those in DFE method in Figure 1a.

### 3. More SEM and EDX results of graphene-wrapped $\text{MnCO}_3$ MSCs

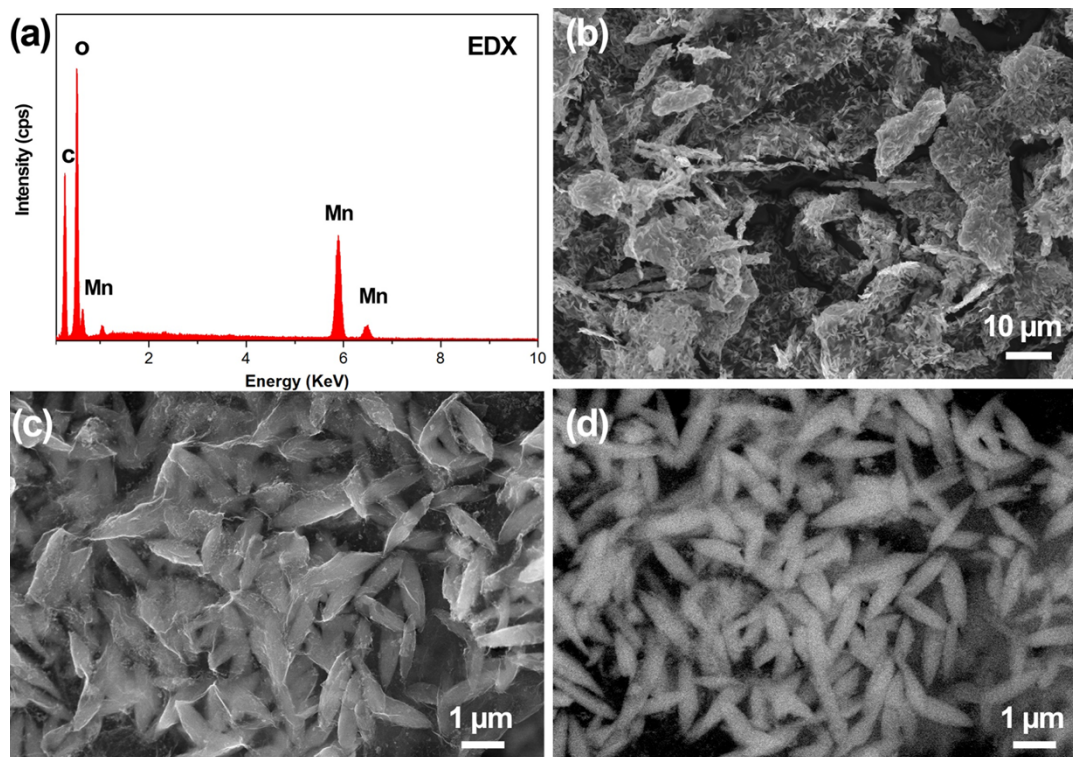

**Figure S3.** (a) EDX analysis and (b) SEM image of graphene-wrapped  $\text{MnCO}_3$  MSCs. (c) Secondary and (d) back-scattered SEM images taken from the same location of the novel composite.

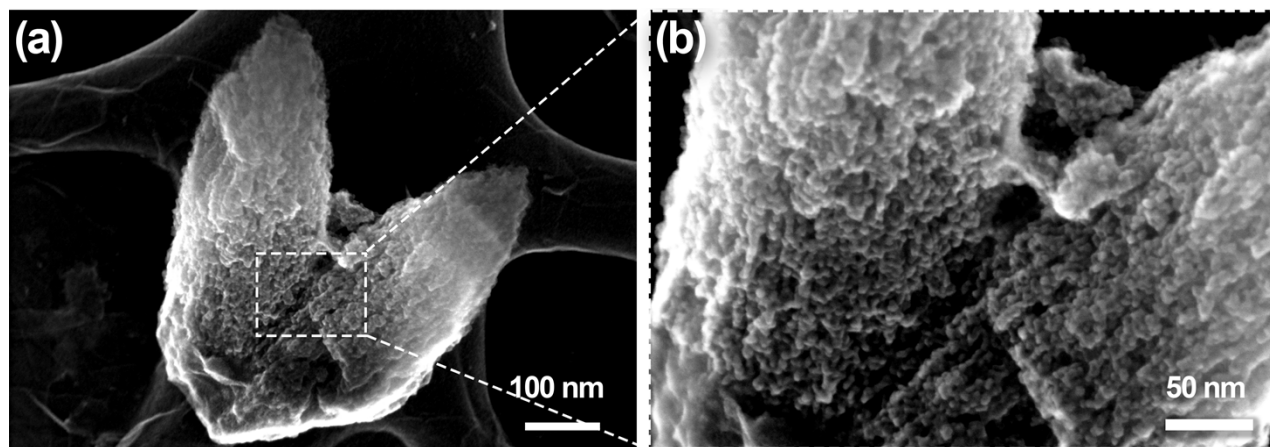

**Figure S4.** Cross-sectional SEM images of  $\text{MnCO}_3$  MSCs.



## 4. More XPS data

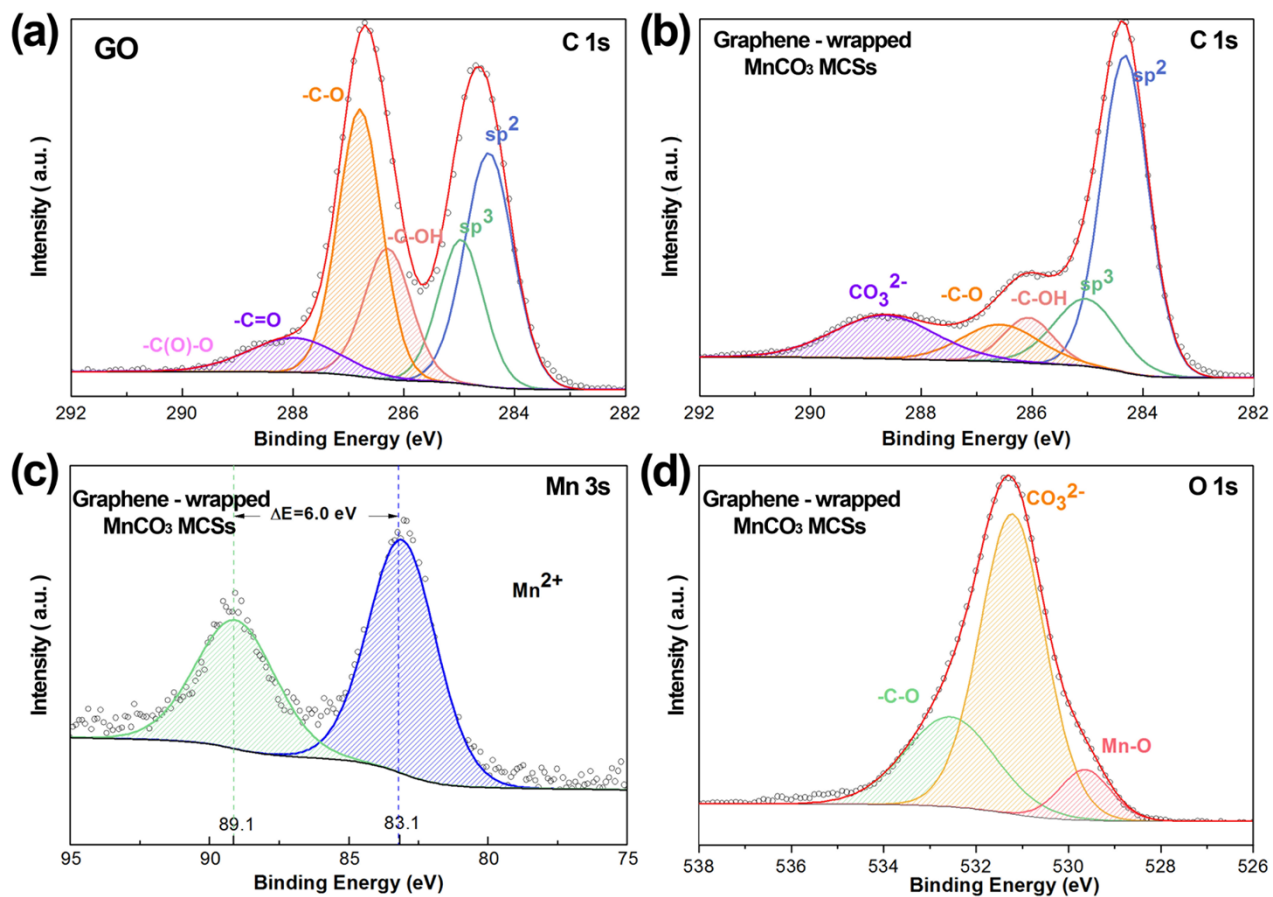

**Figure S5.** XPS analyses of GO (a) C 1s and (b) C 1s, (c) Mn 3s, and (d) O 1s of graphene-wrapped  $\text{MnCO}_3$  MSCs.

## 5. Nanocrystalline MnCO<sub>3</sub> with RGO (nc-MnCO<sub>3</sub>-RGO)

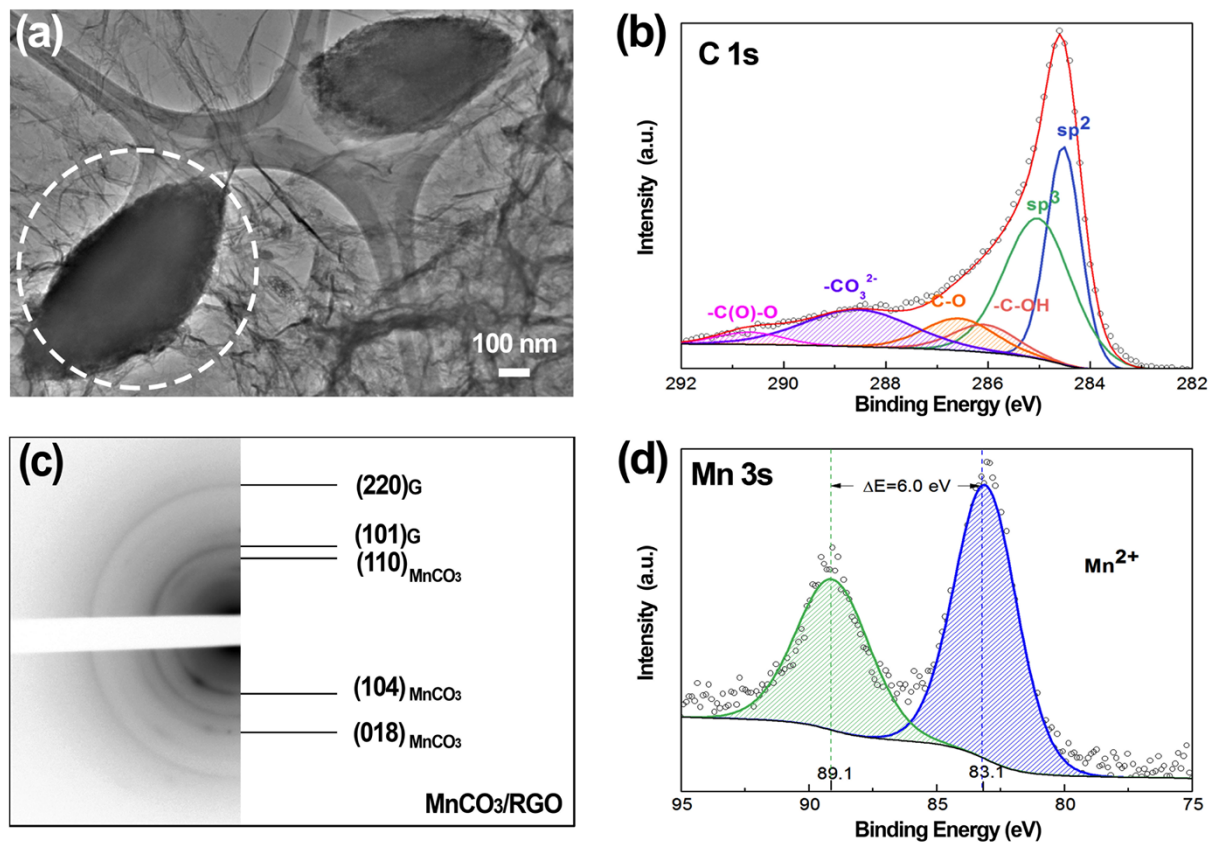

**Figure S6.** (a) TEM image, XPS spectra of (b) C 1s and (d) Mn 3s of nc-MnCO<sub>3</sub>-RGO composite, (c) electron diffraction from the selected area in the white circle in (a).

## 6. Nanoflake MnO<sub>2</sub> with RGO (nano-MnO<sub>2</sub>-RGO)

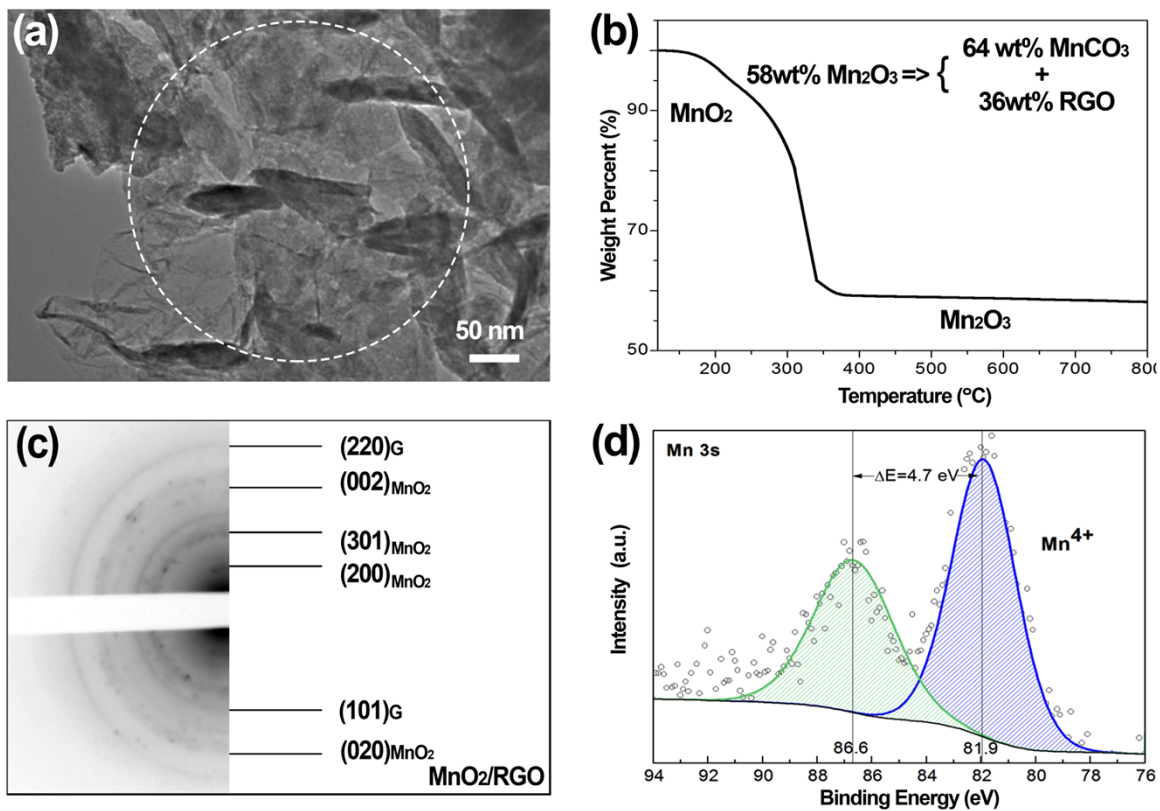

**Figure S7.** (a) TEM image, (b) TGA, (c) electron diffraction from the selected area in the white circle in (a). (d) XPS spectrum of Mn 3s of nano-MnO<sub>2</sub>-RGO composite.



## 7. More electrochemical data

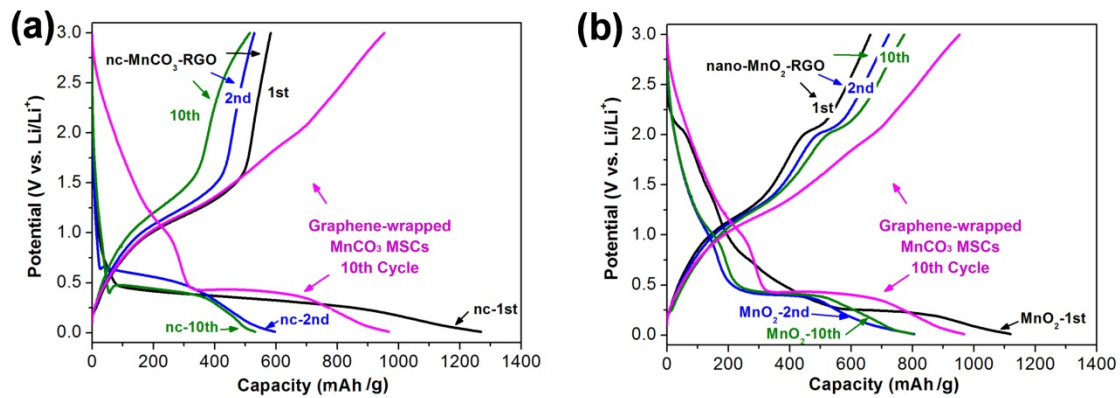

**Figure S8.** The 1<sup>st</sup>, 2<sup>nd</sup> and 10<sup>th</sup> activation charging-discharging curves of (a) nc-MnCO<sub>3</sub>-RGO and (b) nano-MnO<sub>2</sub>-RGO, compared with the 10<sup>th</sup> activation cycle of graphene-wrapped MnCO<sub>3</sub> MSCs.

**8. Characterization of graphene-wrapped  $\text{MnCO}_3$  MSCs and nc- $\text{MnCO}_3$ -RGO after hundreds of cycles**

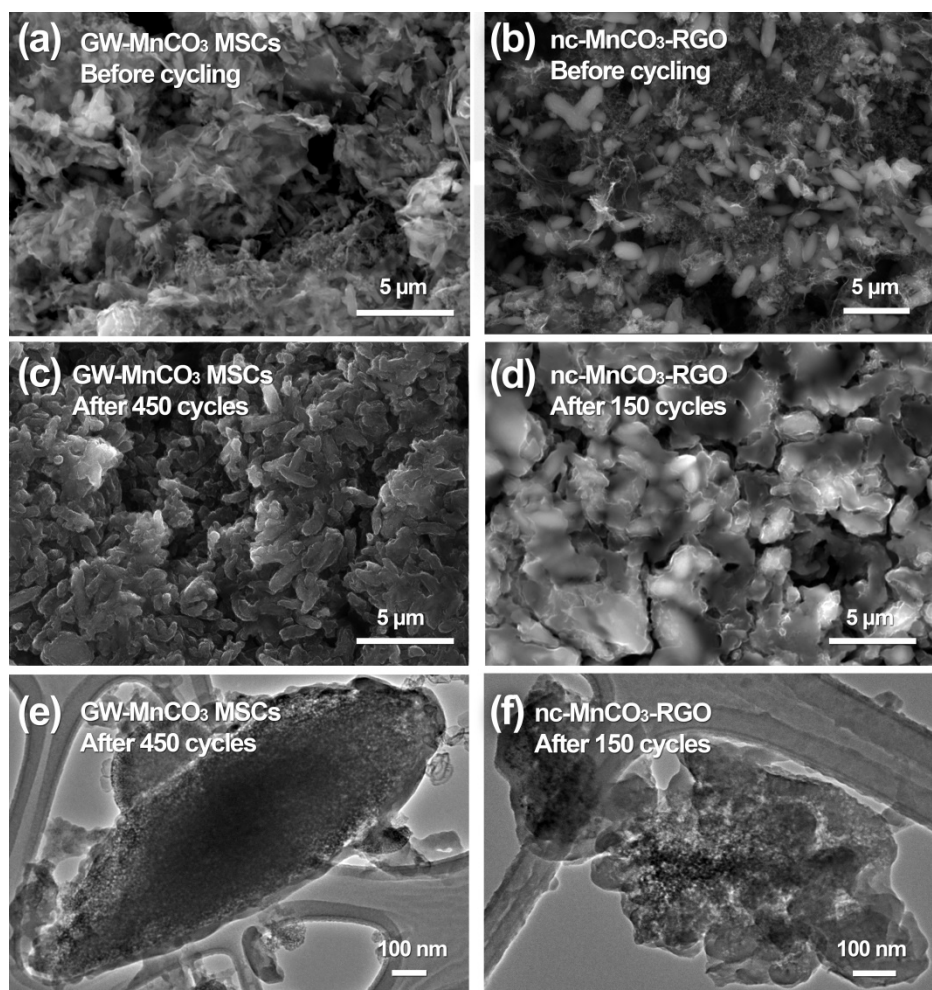

**Figure S9.** SEM and TEM images of graphene-wrapped (GW)  $\text{MnCO}_3$  MSCs and nc- $\text{MnCO}_3$ -RGO before and after cycles.
